# Supplementary material
Source: publisher site journal article supplement (https://www.dovepress.com/article/167578)
Supplement: Supplementary file 1 [file get_supplementary_file.php]

## Supplementary materials

| Author                    | Year | Scientific design          |              |                    |                            |                     | Laboratory methodology |                                     |                                         |                                                             |                              | Generalizability           |                          |                       |                   |                      | Results analysis      |                                           |                     |                       | Total score |
|---------------------------|------|----------------------------|--------------|--------------------|----------------------------|---------------------|------------------------|-------------------------------------|-----------------------------------------|-------------------------------------------------------------|------------------------------|----------------------------|--------------------------|-----------------------|-------------------|----------------------|-----------------------|-------------------------------------------|---------------------|-----------------------|-------------|
|                           |      | Study objective definition | Study design | Outcome definition | Statistical considerations | Statistical methods | Blinding               | Sample description and conservation | Description of the experimental process | Description of the negative and positive control procedures | Test reproducibility control | Patient selection criteria | Patients characteristics | Treatment description | Source of samples | unassessable samples | Follow-up description | Survival analysis according to the marker | Univariate analysis | Multivariate analysis |             |
| Na II <sup>19</sup>       | 2007 | 1                          | 1            | 1                  | 0                          | 1                   | 2                      | 2                                   | 2                                       | 0                                                           | 0                            | 1                          | 2                        | 1                     | 2                 | 0                    | 2                     | 2                                         | 1                   | 0                     | 21          |
| Suehisa H <sup>20</sup>   | 2007 | 2                          | 1            | 2                  | 0                          | 2                   | 2                      | 2                                   | 1                                       | 2                                                           | 2                            | 1                          | 2                        | 2                     | 2                 | 1                    | 2                     | 2                                         | 1                   | 2                     | 31          |
| Marks JL <sup>21</sup>    | 2008 | 2                          | 1            | 2                  | 1                          | 2                   | 2                      | 2                                   | 1                                       | 0                                                           | 1                            | 2                          | 2                        | 1                     | 2                 | 2                    | 2                     | 2                                         | 1                   | 2                     | 30          |
| Kobayashi N <sup>22</sup> | 2008 | 1                          | 1            | 1                  | 0                          | 1                   | 2                      | 2                                   | 1                                       | 0                                                           | 0                            | 2                          | 1                        | 2                     | 2                 | 2                    | 1                     | 2                                         | 2                   | 2                     | 25          |
| Woo T <sup>24</sup>       | 2009 | 1                          | 1            | 2                  | 1                          | 2                   | 2                      | 2                                   | 2                                       | 1                                                           | 0                            | 2                          | 2                        | 2                     | 2                 | 1                    | 1                     | 2                                         | 2                   | 2                     | 30          |
| Hosokawa S <sup>23</sup>  | 2009 | 1                          | 1            | 2                  | 1                          | 2                   | 2                      | 2                                   | 1                                       | 1                                                           | 0                            | 2                          | 1                        | 2                     | 2                 | 2                    | 2                     | 2                                         | 1                   | 2                     | 29          |
| Lee YJ <sup>25</sup>      | 2009 | 1                          | 1            | 2                  | 0                          | 2                   | 2                      | 1                                   | 1                                       | 0                                                           | 0                            | 2                          | 2                        | 1                     | 2                 | 2                    | 2                     | 2                                         | 2                   | 2                     | 27          |
| Galleges <sup>26</sup>    | 2009 | 2                          | 2            | 2                  | 0                          | 2                   | 2                      | 2                                   | 2                                       | 2                                                           | 2                            | 2                          | 2                        | 1                     | 2                 | 0                    | 1                     | 2                                         | 2                   | 2                     | 32          |
| Kosaka T <sup>27</sup>    | 2009 | 1                          | 1            | 2                  | 0                          | 2                   | 2                      | 2                                   | 2                                       | 0                                                           | 0                            | 2                          | 2                        | 1                     | 2                 | 0                    | 2                     | 2                                         | 1                   | 2                     | 26          |
| Liu HP <sup>28</sup>      | 2010 | 1                          | 1            | 1                  | 1                          | 2                   | 2                      | 2                                   | 1                                       | 1                                                           | 0                            | 2                          | 2                        | 2                     | 2                 | 2                    | 2                     | 2                                         | 0                   | 2                     | 28          |
| Tsao MS <sup>29</sup>     | 2011 | 2                          | 2            | 2                  | 0                          | 2                   | 2                      | 2                                   | 2                                       | 1                                                           | 2                            | 1                          | 1                        | 1                     | 2                 | 1                    | 2                     | 1                                         | 0                   | 2                     | 28          |
| D'Angelo SP <sup>30</sup> | 2012 | 1                          | 1            | 1                  | 1                          | 1                   | 2                      | 1                                   | 1                                       | 0                                                           | 0                            | 2                          | 2                        | 1                     | 2                 | 2                    | 1                     | 2                                         | 0                   | 1                     | 22          |
| Kim HR <sup>31</sup>      | 2012 | 2                          | 1            | 1                  | 1                          | 1                   | 2                      | 1                                   | 1                                       | 0                                                           | 0                            | 1                          | 2                        | 2                     | 2                 | 1                    | 2                     | 1                                         | 0                   | 2                     | 23          |
| Scocianti C <sup>32</sup> | 2012 | 2                          | 2            | 1                  | 1                          | 2                   | 2                      | 2                                   | 1                                       | 0                                                           | 1                            | 2                          | 2                        | 1                     | 2                 | 2                    | 2                     | 1                                         | 0                   | 2                     | 28          |
| Sonobe M <sup>33</sup>    | 2012 | 1                          | 2            | 2                  | 0                          | 1                   | 2                      | 2                                   | 2                                       | 1                                                           | 1                            | 1                          | 2                        | 2                     | 2                 | 0                    | 2                     | 2                                         | 1                   | 2                     | 28          |
| Izar B <sup>13</sup>      | 2013 | 1                          | 1            | 1                  | 0                          | 1                   | 2                      | 1                                   | 1                                       | 1                                                           | 1                            | 2                          | 2                        | 1                     | 2                 | 2                    | 2                     | 2                                         | 1                   | 2                     | 26          |
| Sun HB <sup>35</sup>      | 2013 | 1                          | 1            | 2                  | 0                          | 2                   | 2                      | 2                                   | 1                                       | 0                                                           | 0                            | 1                          | 2                        | 1                     | 2                 | 1                    | 2                     | 2                                         | 2                   | 2                     | 26          |
| Kim YT <sup>11</sup>      | 2013 | 2                          | 1            | 1                  | 1                          | 2                   | 2                      | 2                                   | 2                                       | 0                                                           | 1                            | 1                          | 2                        | 2                     | 2                 | 2                    | 1                     | 2                                         | 0                   | 2                     | 28          |
| Maki Y <sup>43</sup>      | 2013 | 1                          | 1            | 1                  | 0                          | 2                   | 2                      | 2                                   | 1                                       | 1                                                           | 1                            | 2                          | 2                        | 1                     | 2                 | 1                    | 1                     | 2                                         | 1                   | 1                     | 25          |
| Ragusa M <sup>17</sup>    | 2014 | 1                          | 1            | 2                  | 0                          | 2                   | 2                      | 2                                   | 1                                       | 0                                                           | 1                            | 1                          | 2                        | 1                     | 2                 | 0                    | 1                     | 2                                         | 2                   | 2                     | 25          |
| Ohba T <sup>37</sup>      | 2014 | 1                          | 1            | 2                  | 0                          | 1                   | 2                      | 2                                   | 2                                       | 0                                                           | 0                            | 1                          | 2                        | 1                     | 2                 | 1                    | 1                     | 2                                         | 1                   | 1                     | 23          |
| Liu WS <sup>38</sup>      | 2014 | 2                          | 1            | 2                  | 0                          | 2                   | 2                      | 0                                   | 1                                       | 0                                                           | 0                            | 2                          | 2                        | 2                     | 2                 | 2                    | 2                     | 1                                         | 2                   | 2                     | 27          |
| Ayyoub M <sup>39</sup>    | 2014 | 1                          | 1            | 1                  | 0                          | 2                   | 2                      | 2                                   | 1                                       | 1                                                           | 0                            | 1                          | 1                        | 1                     | 2                 | 1                    | 1                     | 1                                         | 1                   | 0                     | 20          |
| Kudo Y <sup>40</sup>      | 2015 | 2                          | 1            | 2                  | 0                          | 2                   | 2                      | 2                                   | 1                                       | 1                                                           | 0                            | 2                          | 2                        | 1                     | 2                 | 2                    | 2                     | 2                                         | 2                   | 2                     | 30          |
| Nadal E <sup>41</sup>     | 2015 | 1                          | 1            | 2                  | 0                          | 2                   | 2                      | 1                                   | 1                                       | 1                                                           | 0                            | 1                          | 2                        | 2                     | 2                 | 1                    | 2                     | 2                                         | 2                   | 2                     | 27          |
| Nishii T <sup>42</sup>    | 2016 | 1                          | 1            | 2                  | 0                          | 1                   | 2                      | 2                                   | 1                                       | 0                                                           | 0                            | 1                          | 2                        | 0                     | 2                 | 0                    | 1                     | 2                                         | 0                   | 2                     | 20          |
| Kadota K <sup>16</sup>    | 2016 | 2                          | 1            | 2                  | 0                          | 2                   | 2                      | 2                                   | 1                                       | 0                                                           | 1                            | 2                          | 2                        | 0                     | 2                 | 1                    | 1                     | 2                                         | 1                   | 2                     | 26          |
| Isaka T <sup>43</sup>     | 2016 | 1                          | 1            | 2                  | 0                          | 2                   | 2                      | 2                                   | 1                                       | 0                                                           | 0                            | 2                          | 2                        | 2                     | 2                 | 2                    | 2                     | 2                                         | 0                   | 2                     | 27          |
| Zheng D <sup>17</sup>     | 2016 | 1                          | 1            | 2                  | 1                          | 2                   | 2                      | 2                                   | 1                                       | 0                                                           | 0                            | 1                          | 2                        | 1                     | 2                 | 0                    | 1                     | 2                                         | 0                   | 2                     | 23          |
| Kaseda K <sup>44</sup>    | 2017 | 2                          | 1            | 2                  | 0                          | 2                   | 2                      | 2                                   | 2                                       | 1                                                           | 0                            | 1                          | 2                        | 2                     | 2                 | 1                    | 1                     | 2                                         | 2                   | 0                     | 27          |
| Sullivan I <sup>45</sup>  | 2017 | 1                          | 1            | 2                  | 0                          | 2                   | 2                      | 2                                   | 1                                       | 1                                                           | 0                            | 2                          | 2                        | 1                     | 2                 | 0                    | 1                     | 2                                         | 0                   | 2                     | 24          |
| Yotsukura M <sup>46</sup> | 2017 | 1                          | 1            | 1                  | 0                          | 1                   | 2                      | 2                                   | 1                                       | 0                                                           | 1                            | 2                          | 2                        | 1                     | 2                 | 1                    | 2                     | 2                                         | 0                   | 2                     | 24          |
| Takamochi K <sup>47</sup> | 2017 | 1                          | 1            | 2                  | 1                          | 2                   | 2                      | 2                                   | 1                                       | 0                                                           | 1                            | 1                          | 2                        | 1                     | 2                 | 1                    | 2                     | 2                                         | 0                   | 2                     | 26          |

**TableS1.** Score of quality assessment for included studies

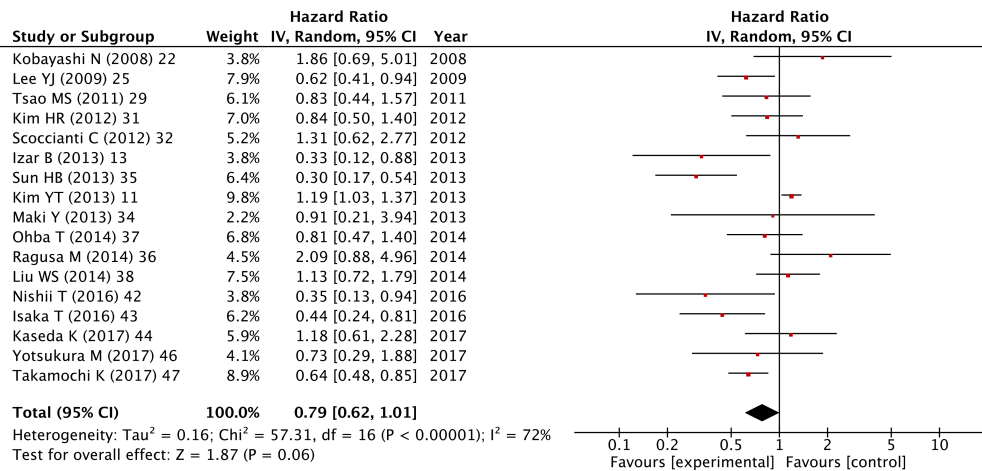

**FigureS1** Random-effect model forest plot of DFS of EGFR mutations.

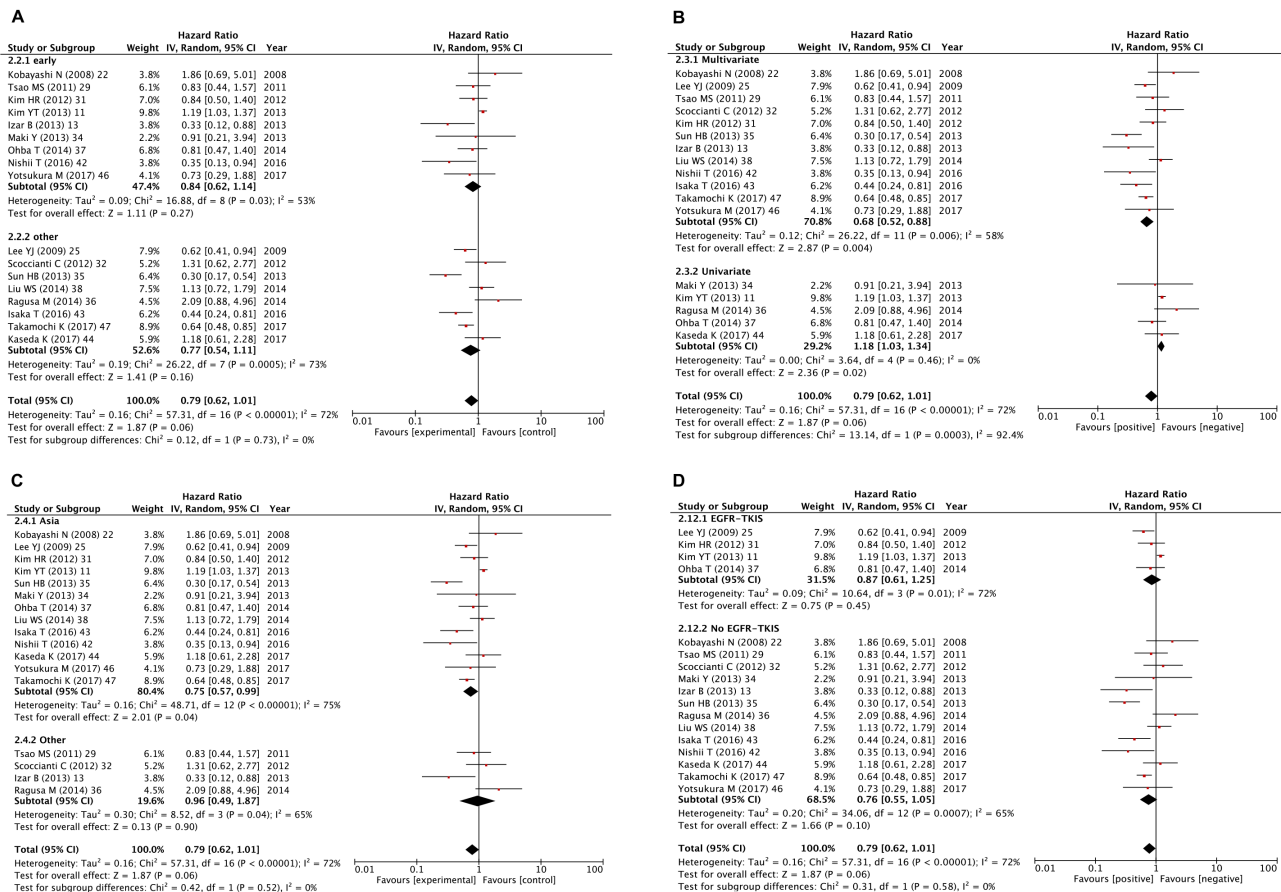

**FigureS2 A.** Random-effect model forest plot of DFS of EGFR mutations in stage subgroup analysis according to the patient's pathological staging. **B.** Random-effect model forest plot of DFS in statistical analysis method subgroup analysis according to EGFR mutations. **C.** Random-effect model forest plot of DFS of EGFR mutations in race subgroup analysis according to source of the studies. **D.** Random-effect model forest plot of DFS of EGFR mutations in EGFR-TKIs subgroup analysis according to the adjuvant treatment.

Begg's Test

adj. Kendall's Score (P-Q) = 16  
 Std. Dev. of Score = 24.28  
 Number of Studies = 17  
 z = 0.66  
 Pr > |z| = 0.510  
 z = 0.62 (continuity corrected)  
 Pr > |z| = 0.537 (continuity corrected)

Egger's test

| Std_Eff | Coef.     | Std. Err. | t     | P> t  | [95% Conf. Interval] |
|---------|-----------|-----------|-------|-------|----------------------|
| slope   | .1382493  | .1589251  | 0.87  | 0.398 | -.2004915 .4769902   |
| bias    | -1.227112 | .7356253  | -1.67 | 0.116 | -2.79506 .3408361    |

FigureS3. Begg's test and Egger's test for publication bias of DFS of EGFR

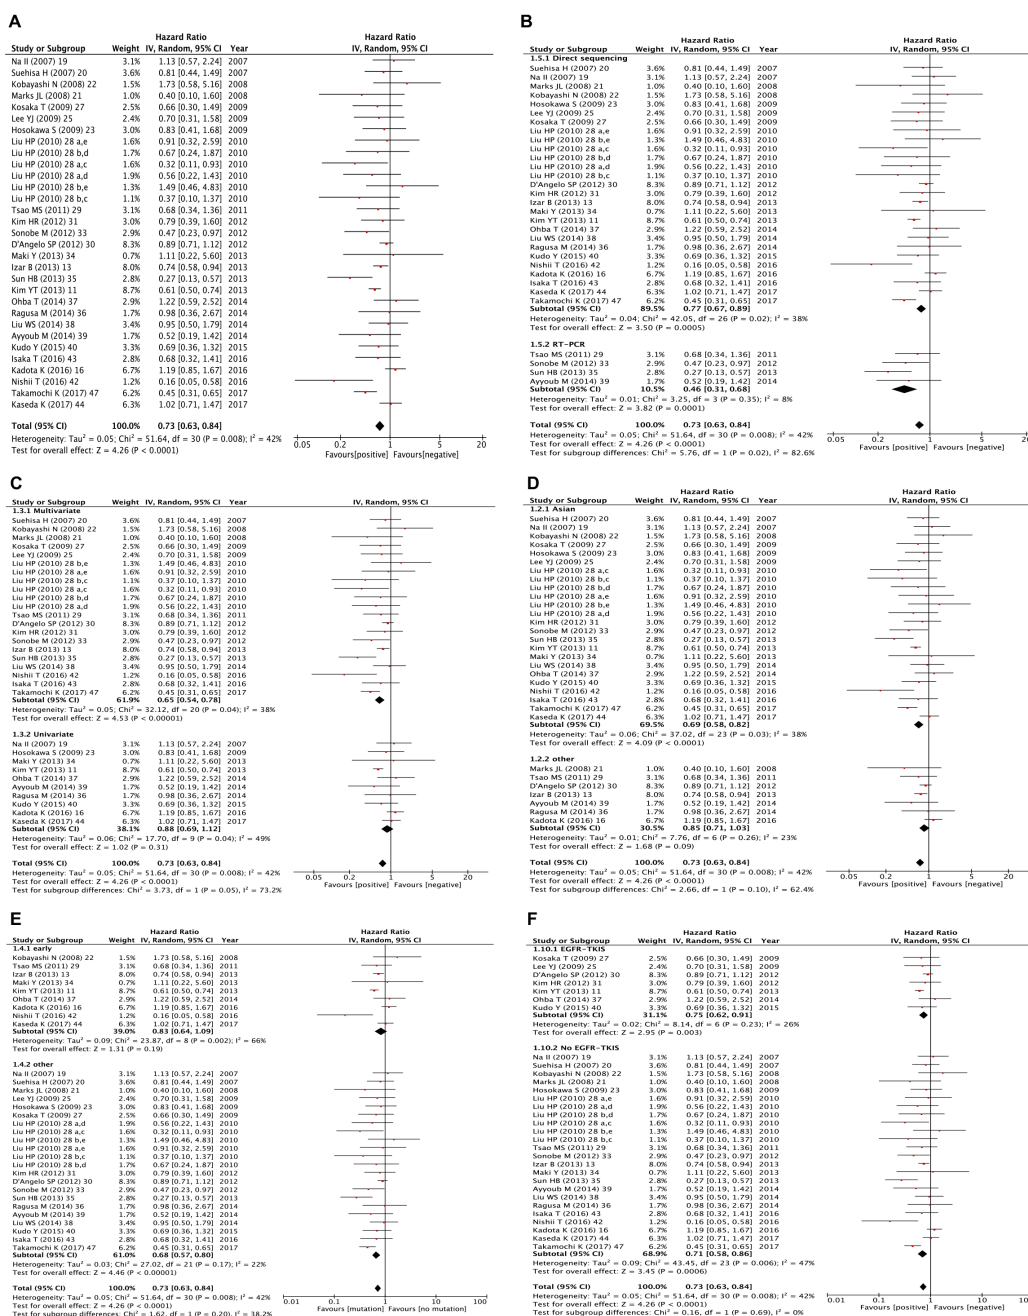

**FigureS4 A.** Random-effect model forest plot of OS of EGFR mutations. **B.** Random-effect model forest plot of OS in detection method group analysis according to EGFR mutations. **C.** Random-effect model forest plot of OS in statistical analysis method group analysis according to EGFR mutations. **D.** Random-effect model forest plot of OS of EGFR mutations in race subgroup analysis according to source of the studies. **E.** Random-effect model forest plot of OS of EGFR mutations in stage subgroup analysis according to the patient's pathological staging. **F.** Random-effect model forest plot of OS of EGFR mutations in EGFR-TKIs subgroup analysis according to the adjuvant treatment.

**Comment:**

a: All patients

b: Five patients with no data at the EGFR mutation variable, and 18 patients who had received TKI treatment for tumor recurrence were not included

c: Mutation site: L858R

d: Mutation site: 19 Del

e: Mutation site: others

Begg's Test

```

adj. Kendall's Score (P-Q) =   -77
Std. Dev. of Score =   56.05
Number of Studies =     30
z =   -1.37
Pr > |z| =   0.170
z =   1.36 (continuity corrected)
Pr > |z| =   0.175 (continuity corrected)

```

Egger's test

| Std_Eff | Coef.     | Std. Err. | t     | P> t  | [95% Conf. Interval] |           |
|---------|-----------|-----------|-------|-------|----------------------|-----------|
| slope   | -.238729  | .1098073  | -2.17 | 0.038 | -.4636592            | -.0137989 |
| bias    | -.2312069 | .4302375  | -0.54 | 0.595 | -1.112508            | .6500947  |

**FigureS5.** Begg's test and Egger's test for publication bias of OS of EGFR

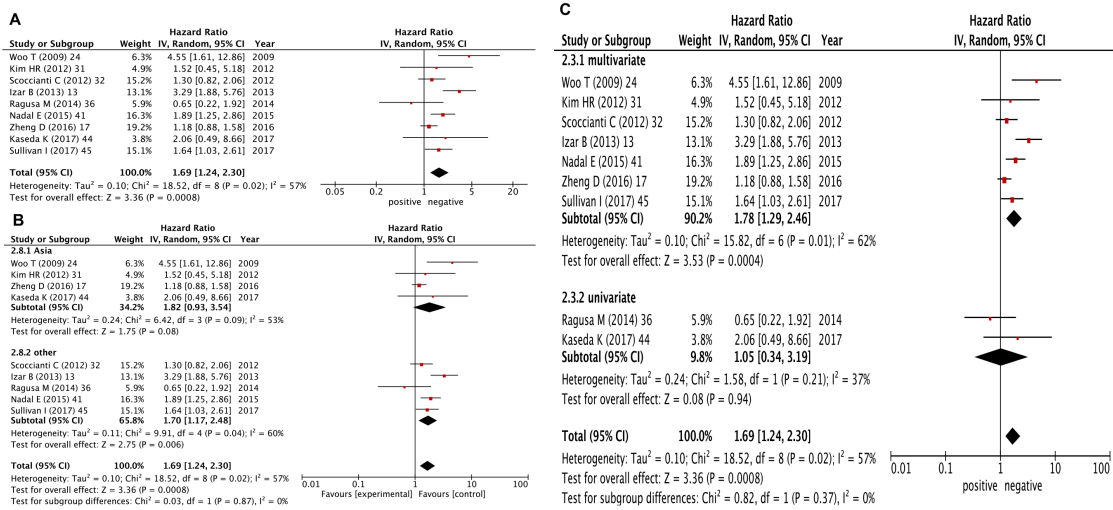

**FigureS6 A.** Random-effect model forest plot of DFS of KRAS mutations **B.** Random-effect model forest plot of DFS of KRAS mutations in race subgroup analysis according to source of the studies. **C.** Random-effect model forest plot of DFS in statistical analysis method subgroup analysis according to KRAS mutations.

Begg's Test

adj. Kendall's Score (P-Q) = 0  
 Std. Dev. of Score = 16.39  
 Number of Studies = 13  
 z = 0.00  
 Pr > |z| = 1.000  
 z = -0.06 (continuity corrected)  
 Pr > |z| = 1.000 (continuity corrected)

Egger's test

| Std_Eff | Coef.    | Std. Err. | t    | P> t  | [95% Conf. Interval] |
|---------|----------|-----------|------|-------|----------------------|
| slope   | .3343489 | .2118974  | 1.58 | 0.143 | -.132034 .8007319    |
| bias    | .2638412 | .7738037  | 0.34 | 0.740 | -1.439289 1.966972   |

**FigureS7.** Begg's test and Egger's test for publication bias of OS of KRAS

## References

- Kim YT, Seong YW, Jung YJ, et al. The presence of mutations in epidermal growth factor receptor gene is not a prognostic factor for long-term outcome after surgical resection of non-small-cell lung cancer. *J Thorac Oncol.* 2013;8(2):171-178.
- Izar B, Sequist L, Lee M, et al. The impact of EGFR mutation status on outcomes in patients with resected stage I non-small cell lung cancers. *Ann Thorac Surg.* 2013;96(3):962-968.
- Kadota K, Sima CS, Arcila ME, et al. KRAS Mutation Is a Significant Prognostic Factor in Early-stage Lung Adenocarcinoma. *Am J Surg Pathol.* 2016;40(12):1579-1590.
- Zheng D, Wang R, Zhang Y, et al. The prevalence and prognostic significance of KRAS mutation

subtypes in lung adenocarcinomas from Chinese populations. *Onco Targets Ther.* 2016;9:833-843.

1. Siegel RL, Miller KD, Jemal A. Cancer Statistics, 2017. *CA Cancer J Clin.* 2017;67(1):7-30.
2. Lauro S, Onesti CE, Righini R, Marchetti P. The use of bevacizumab in non-small cell lung cancer: an update. *Anticancer Res.* 2014;34(4):1537-1545.
3. He B, Lu C, Zheng G, et al. Combination therapeutics in complex diseases. *J Cell Mol Med.* 2016;20(12):2231-2240.
4. Manser R, Wright G, Hart D, Byrnes G, Campbell DA. Surgery for early stage non-small cell lung cancer. *Cochrane Database Syst Rev.* 2005(1):CD004699.
5. Saisho S, Yasuda K, Maeda A, et al. Post-recurrence survival of patients with non-small-cell lung cancer after curative resection with or without induction/adjuvant chemotherapy. *Interact Cardiovasc Thorac Surg.* 2013;16(2):166-172.
6. Takenaka T, Takenoyama M, Yamaguchi M, et al. Impact of the epidermal growth factor receptor mutation status on the post-recurrence survival of patients with surgically resected non-small-cell lung cancer. *Eur J Cardiothorac Surg.* 2015;47(3):550-555.
7. Lee ES, Son DS, Kim SH, et al. Prediction of recurrence-free survival in postoperative non-small cell lung cancer patients by using an integrated model of clinical information and gene expression. *Clin Cancer Res.* 2008;14(22):7397-7404.
8. Zhu QG, Zhang SM, Ding XX, He B, Zhang HQ. Driver genes in non-small cell lung cancer: Characteristics, detection methods, and targeted therapies. *Oncotarget.* 2017;8(34):57680-57692.
9. Ciardiello F, Tortora G. EGFR antagonists in cancer treatment. *N Engl J Med.* 2008;358(11):1160-1174.
10. Han SW, Kim TY, Hwang PG, et al. Predictive and prognostic impact of epidermal growth factor receptor mutation in non-small-cell lung cancer patients treated with gefitinib. *J Clin Oncol.* 2005;23(11):2493-2501.
11. Kim YT, Seong YW, Jung YJ, et al. The presence of mutations in epidermal growth factor receptor gene is not a prognostic factor for long-term outcome after surgical resection of non-small-cell lung cancer. *J Thorac Oncol.* 2013;8(2):171-178.
12. Ma L, Qiu B, Zhang J, et al. Survival and prognostic factors of non-small cell lung cancer patients with postoperative locoregional recurrence treated with radical radiotherapy. *Chin J Cancer.* 2017;36(1):93.
13. Izar B, Sequist L, Lee M, et al. The impact of EGFR mutation status on outcomes in patients with resected stage I non-small cell lung cancers. *Ann Thorac Surg.* 2013;96(3):962-968.
14. Soulieres D, Greer W, Magliocco AM, et al. KRAS mutation testing in the treatment of metastatic colorectal cancer with anti-EGFR therapies. *Curr Oncol.* 2010;17 Suppl 1:S31-40.
15. Allegra CJ, Jessup JM, Somerfield MR, et al. American Society of Clinical Oncology provisional clinical

opinion: testing for KRAS gene mutations in patients with metastatic colorectal carcinoma to predict response to anti-epidermal growth factor receptor monoclonal antibody therapy. *J Clin Oncol.* 2009;27(12):2091-2096.

16. Kadota K, Sima CS, Arcila ME, et al. KRAS Mutation Is a Significant Prognostic Factor in Early-stage Lung Adenocarcinoma. *Am J Surg Pathol.* 2016;40(12):1579-1590.
17. Zheng D, Wang R, Zhang Y, et al. The prevalence and prognostic significance of KRAS mutation subtypes in lung adenocarcinomas from Chinese populations. *Onco Targets Ther.* 2016;9:833-843.
18. Steels E, Paesmans M, Berghmans T, et al. Role of p53 as a prognostic factor for survival in lung cancer: a systematic review of the literature with a meta-analysis. *Eur Respir J.* 2001;18(4):705-719.
19. Na, II, Rho JK, Choi YJ, et al. Clinical features reflect exon sites of EGFR mutations in patients with resected non-small-cell lung cancer. *J Korean Med Sci.* 2007;22(3):393-399.
20. Suehisa H, Toyooka S, Hotta K, et al. Epidermal growth factor receptor mutation status and adjuvant chemotherapy with uracil-tegafur for adenocarcinoma of the lung. *J Clin Oncol.* 2007;25(25):3952-3957.
21. Marks JL, Broderick S, Zhou Q, et al. Prognostic and therapeutic implications of EGFR and KRAS mutations in resected lung adenocarcinoma. *J Thorac Oncol.* 2008;3(2):111-116.
22. Kobayashi N, Toyooka S, Ichimura K, et al. Non-BAC component but not epidermal growth factor receptor gene mutation is associated with poor outcomes in small adenocarcinoma of the lung. *J Thorac Oncol.* 2008;3(7):704-710.
23. Hosokawa S, Toyooka S, Fujiwara Y, et al. Comprehensive analysis of EGFR signaling pathways in Japanese patients with non-small cell lung cancer. *Lung Cancer.* 2009;66(1):107-113.
24. Woo T, Okudela K, Yazawa T, et al. Prognostic value of KRAS mutations and Ki-67 expression in stage I lung adenocarcinomas. *Lung Cancer.* 2009;65(3):355-362.
25. Lee YJ, Park IK, Park MS, et al. Activating mutations within the EGFR kinase domain: a molecular predictor of disease-free survival in resected pulmonary adenocarcinoma. *J Cancer Res Clin Oncol.* 2009;135(12):1647-1654.
26. Galleges Ruiz MI, Floor K, Steinberg SM, et al. Combined assessment of EGFR pathway-related molecular markers and prognosis of NSCLC patients. *Br J Cancer.* 2009;100(1):145-152.
27. Kosaka T, Yatabe Y, Onozato R, Kuwano H, Mitsudomi T. Prognostic implication of EGFR, KRAS, and TP53 gene mutations in a large cohort of Japanese patients with surgically treated lung adenocarcinoma. *J Thorac Oncol.* 2009;4(1):22-29.
28. Liu HP, Isaac Wu HD, Chang JW, et al. Prognostic implications of epidermal growth factor receptor and KRAS gene mutations and epidermal growth factor receptor gene copy numbers in patients with surgically resectable non-small cell lung cancer in Taiwan. *J Thorac Oncol.* 2010;5(8):1175-1184.

29. Tsao MS, Sakurada A, Ding K, et al. Prognostic and predictive value of epidermal growth factor receptor tyrosine kinase domain mutation status and gene copy number for adjuvant chemotherapy in non-small cell lung cancer. *J Thorac Oncol*. 2011;6(1):139-147.
30. D'Angelo SP, Janjigian YY, Ahye N, et al. Distinct clinical course of EGFR-mutant resected lung cancers: results of testing of 1118 surgical specimens and effects of adjuvant gefitinib and erlotinib. *J Thorac Oncol*. 2012;7(12):1815-1822.
31. Kim HR, Shim HS, Chung JH, et al. Distinct clinical features and outcomes in never-smokers with nonsmall cell lung cancer who harbor EGFR or KRAS mutations or ALK rearrangement. *Cancer*. 2012;118(3):729-739.
32. Scoccianti C, Vesin A, Martel G, et al. Prognostic value of TP53, KRAS and EGFR mutations in nonsmall cell lung cancer: the EUELC cohort. *Eur Respir J*. 2012;40(1):177-184.
33. Sonobe M, Kobayashi M, Ishikawa M, et al. Impact of KRAS and EGFR gene mutations on recurrence and survival in patients with surgically resected lung adenocarcinomas. *Ann Surg Oncol*. 2012;19 Suppl 3:S347-354.
34. Maki Y, Soh J, Ichimura K, et al. Impact of GLUT1 and Ki-67 expression on earlystage lung adenocarcinoma diagnosed according to a new international multidisciplinary classification. *Oncol Rep*. 2013;29(1):133-140.
35. Sun HB, Ou W, Li Y, et al. Epidermal growth factor receptor mutation status and adjuvant chemotherapy in resected advanced non-small-cell lung cancer. *Clin Lung Cancer*. 2013;14(4):376-382.
36. Ragusa M, Vannucci J, Ludovini V, et al. Impact of epidermal growth factor receptor and KRAS mutations on clinical outcome in resected non-small cell lung cancer patients. *Am J Clin Oncol*. 2014;37(4):343-349.
37. Ohba T, Toyokawa G, Kometani T, et al. Mutations of the EGFR and K-ras genes in resected stage I lung adenocarcinoma and their clinical significance. *Surg Today*. 2014;44(3):478-486.
38. Liu WS, Zhao LJ, Pang QS, Yuan ZY, Li B, Wang P. Prognostic value of epidermal growth factor receptor mutations in resected lung adenocarcinomas. *Med Oncol*. 2014;31(1):771.
39. Ayyoub M, Memeo L, Alvarez-Fernandez E, et al. Assessment of MAGE-A expression in resected non-small cell lung cancer in relation to clinicopathologic features and mutational status of EGFR and KRAS. *Cancer Immunol Res*. 2014;2(10):943-948.
40. Kudo Y, Shimada Y, Saji H, et al. Prognostic Factors for Survival After Recurrence in Patients With Completely Resected Lung Adenocarcinoma: Important Roles of Epidermal Growth Factor Receptor Mutation Status and the Current Staging System. *Clin Lung Cancer*. 2015;16(6):e213-221.
41. Nadal E, Beer DG, Ramnath N. KRAS-G12C mutation is associated with poor outcome in surgically



resected lung adenocarcinoma. *J Thorac Oncol*. 2015;10(2):e9-10.

42. Nishii T, Yokose T, Miyagi Y, et al. Prognostic value of EGFR mutations in surgically resected pathological stage I lung adenocarcinoma. *Asia Pac J Clin Oncol*. 2016.
43. Isaka T, Nakayama H, Yokose T, et al. Epidermal Growth Factor Receptor Mutations and Prognosis in Pathologic N1-N2 Pulmonary Adenocarcinoma. *Ann Thorac Surg*. 2016;102(6):1821-1828.
44. Kaseda K, Asakura K, Kazama A, Ozawa Y. Clinicopathological and prognostic features of surgically resected pathological stage I lung adenocarcinoma harboring epidermal growth factor receptor and K-ras mutation. *Thorac Cancer*. 2017;8(3):229-237.
45. Sullivan I, Salazar J, Arqueros C, et al. KRAS genetic variant as a prognostic factor for recurrence in resectable non-small cell lung cancer. *Clin Transl Oncol*. 2017;19(7):884-890.
46. Yotsukura M, Yasuda H, Shigenobu T, et al. Clinical and pathological characteristics of EGFR mutation in operable early-stage lung adenocarcinoma. *Lung Cancer*. 2017;109:45-51.
47. Takamochi K, Oh S, Matsunaga T, Suzuki K. Prognostic impacts of EGFR mutation status and subtype in patients with surgically resected lung adenocarcinoma. *J Thorac Cardiovasc Surg*. 2017;154(5):1768-1774 e1761.
